# Supplementary material for: Genome-Wide Identification and Expression Profiling of the WOX Gene Family in Citrus sinensis and Functional Analysis of a CsWUS Member
Source: MDPI journal article supplement (doi:10.3390/ijms22094919), 2021-05-06
Supplement: s1 [file s1]

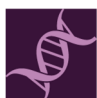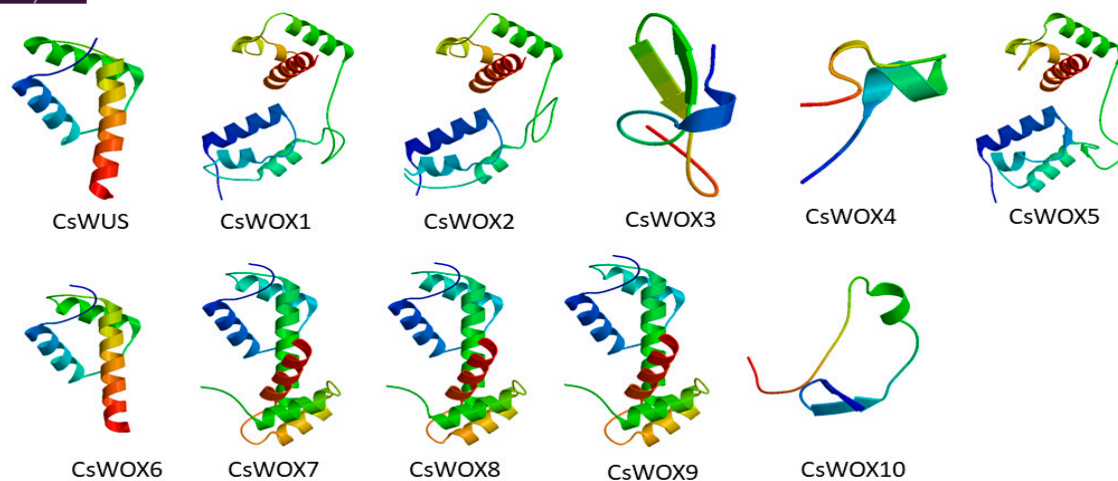

**Figure S1.** Predicted 3D-structure of CsWOX proteins.

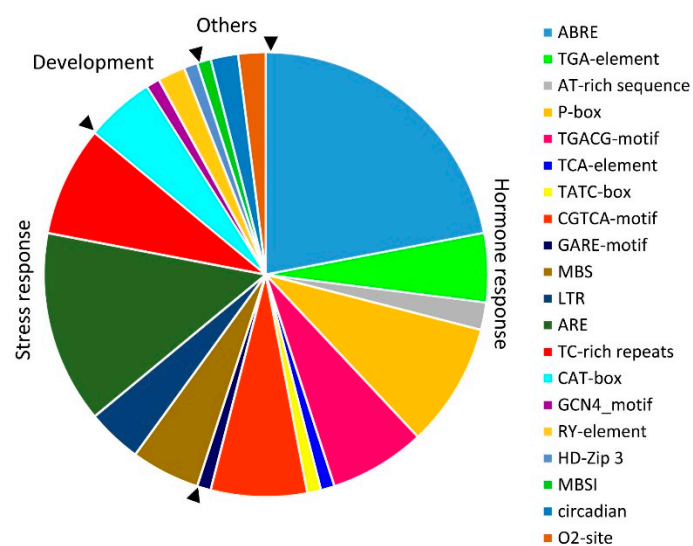

**Figure S2.** The distribution of identified motif of whole CsWOX family based on their biological functions by FIMO tool.

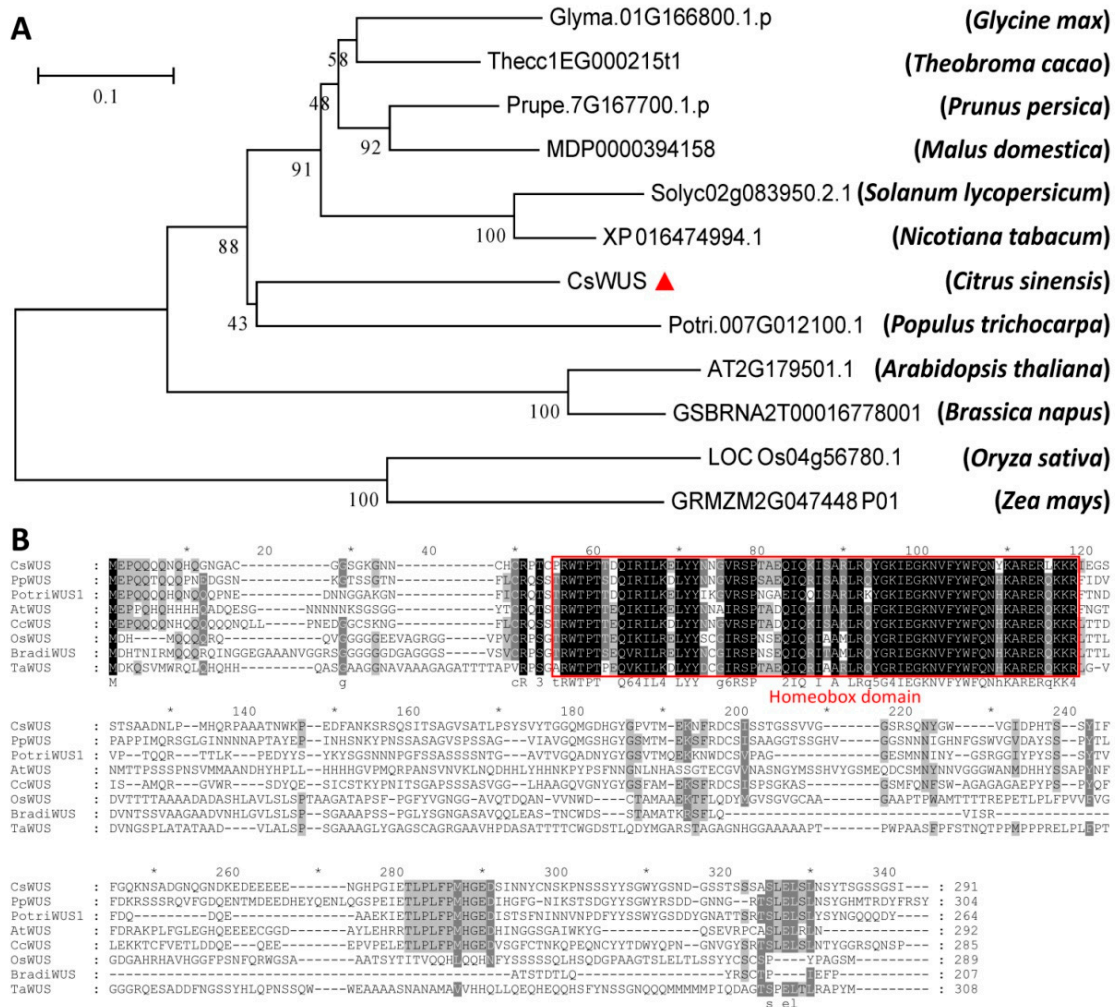

**Figure S3.** Phylogenetic and sequence alignment of CsWUS with its homologs. **(A)** Phylogenetic tree of CsWUS with its homolog proteins. **(B)** Sequence analysis of CsWUS protein with its homolog proteins. CsWUS from *Citrus sinensis*; LOC Os04g56780 from *Oryza sativa* (OsWUS); Bradi5g25113.1.p from *Brachypodium distachyon* (BradiWUS); Cc07g10660 from *Coffea canephora* (CcWUS); AT2G17950 from *Arabidopsis* (AtWUS); XP007203178.1 from *Prunus persica* (PpWUS); TraesCS2A02G491900 from *Triticum aestivum* (TaWUS); KAF7004049 from *Triticum aestivum* (TaWUS); Potri.005G114700.1 from *Populus trichocarpa* (PotriWUS1). Bold red line indicates conserved domain of these proteins.

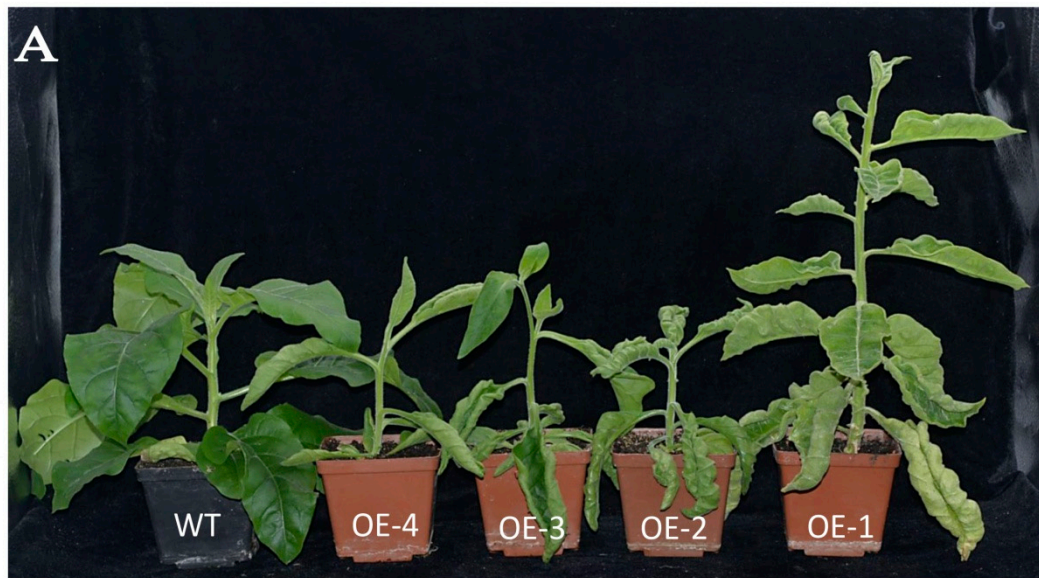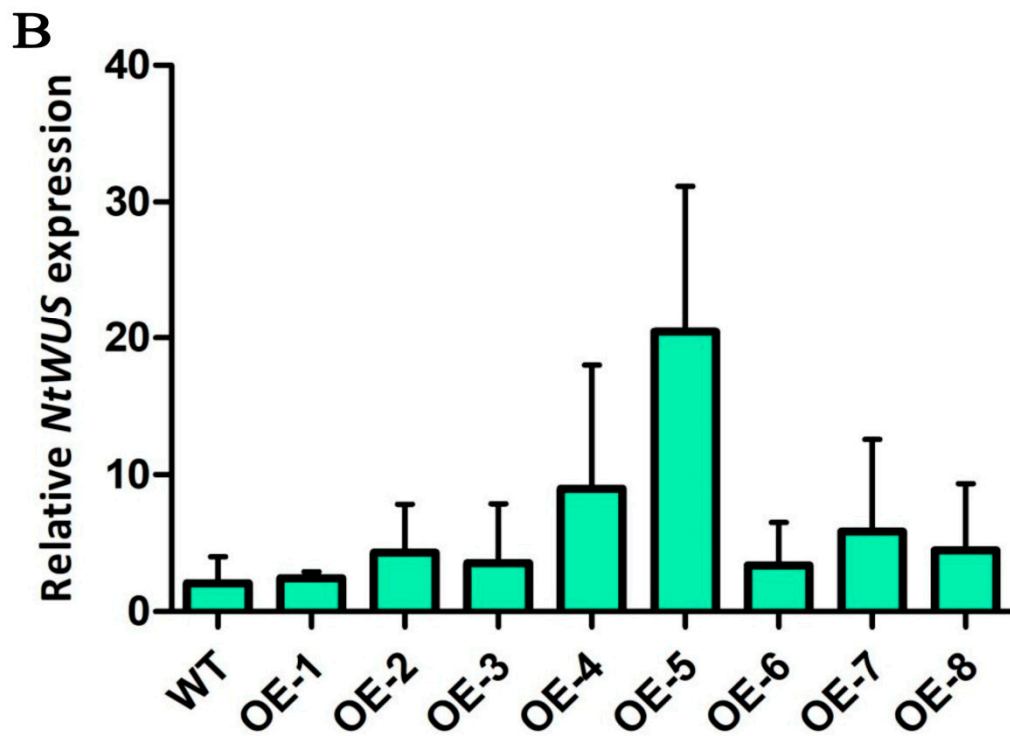

**Figure S4.** (A) Phenotypic analysis of some transgenic lines from *CsWUS*. (B) Relative expression of endogenous *WUS* homolog (*NtWUS*) in transgenic *CsWUS*-OE tobacco lines. *NtActin* was worked as internal control; the mean  $SD_{\pm}$  of three biological replicates is presented.

Figure S4. Tissue specific expression analysis of *CsCYCD3*. Real time PCR validation for *CsCYCD3* expression in different tissues; leaf, flower, fruit, stem, apical meristem, and root. *CsActin* was used as internal control; mean  $\pm$  SD of three biological replicates is presented.

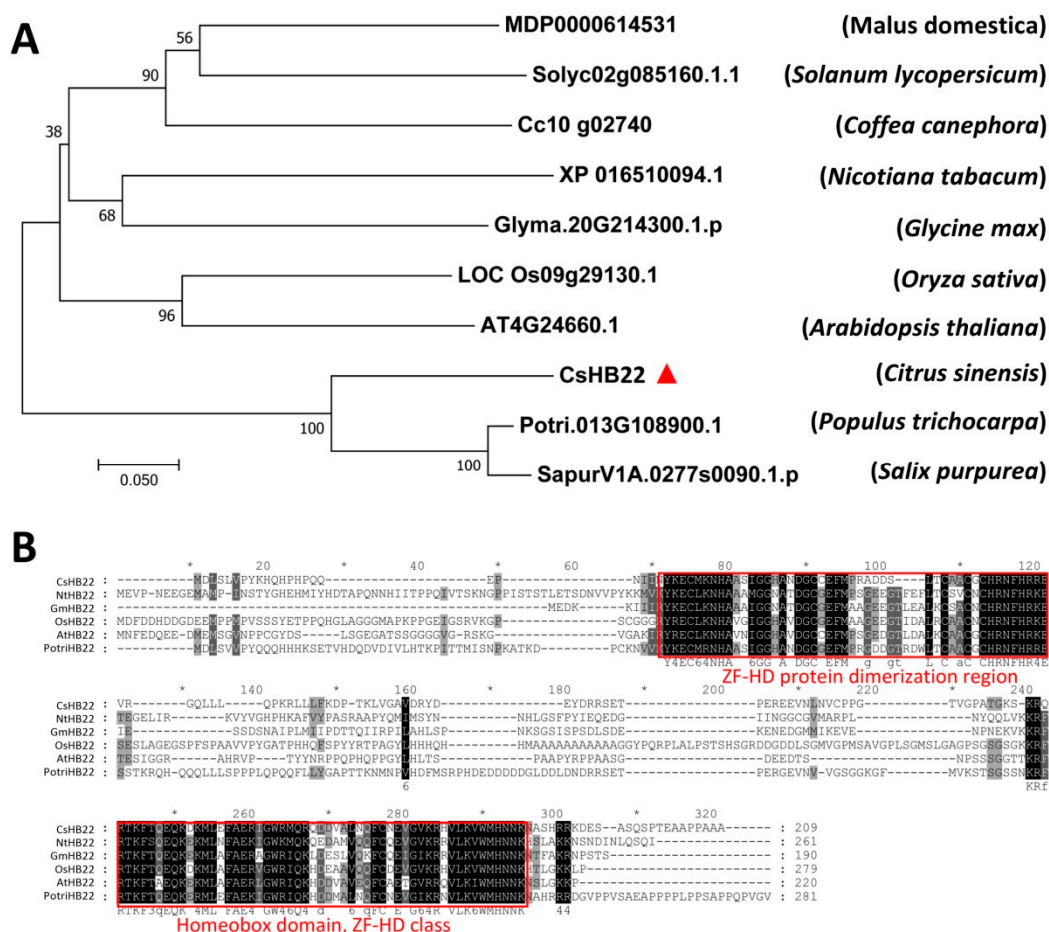

**Figure S5.** Phylogenetic and sequence alignment of CsHB22 with its homologs. (A) Phylogenetic tree of CsHB22 with its homolog proteins. (B) Sequence analysis of CsHB22 protein with its homolog proteins. CsHB22 from *Citrus sinensis*; LOC\_Os09g29130.1 from *Oryza sativa* (LOC\_Os09g2); XP\_016510094.1 from *Nicotiana tabacum* (XP\_0165100); Glyma.20G214300.1.p from *Glycine max* (Glyma.20G); AT4G24660.1 from *Arabidopsis* (AT4G24660); Potri.013G108900.1 from *Populus trichocarpa* (Potri.013G). Bold red line indicates conserved domain of these proteins.



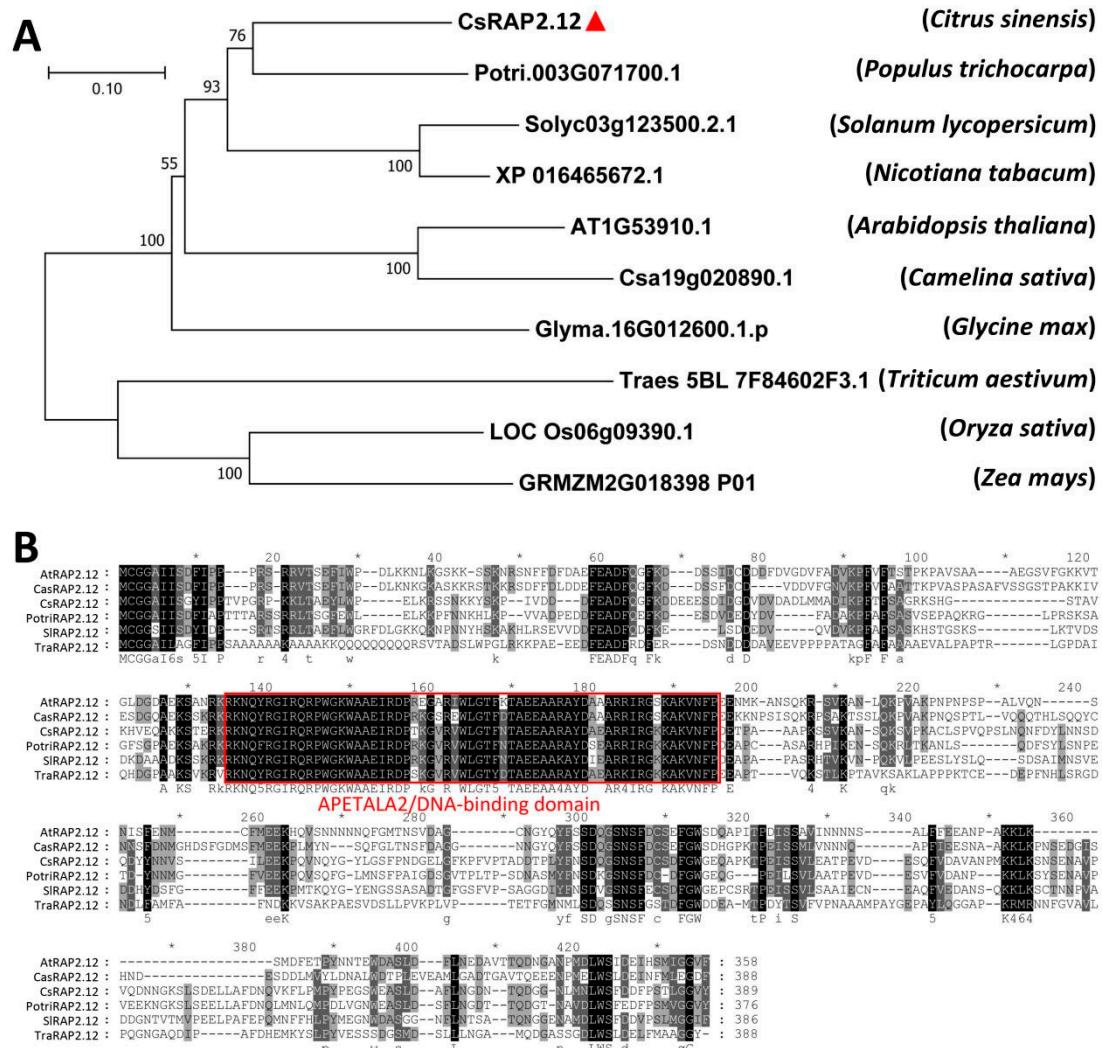

**Figure S6.** Phylogenetic and sequence alignment of CsRAP2-12 with its homologs. **(A)** Phylogenetic tree of CsRAP2-12 with its homolog proteins. **(B)** Sequence analysis of CsRAP2-12 protein with its homolog proteins. CsRAP2-12 from *Citrus sinensis*; Csa19g020890.1 from *Camelina sativa* (Csa19g020890.1); AT1G53910.1 from *Arabidopsis* (AT1G53910.1); Potri.003G from *Populus trichocarpa* (Potri.003G071700.1); Solyc03g12 from *Solanum lycopersicum* (Solyc03g123500.2.1); Traes\_5BL from *Triticum aestivum* (Traes\_5BL\_7F84602F3.1). Bold red line indicates conserved domain of these proteins.

**Supplementary Table S1.** Primers used in this study.

| Function                  | Name           | Sequence 5' to 3'                            |
|---------------------------|----------------|----------------------------------------------|
| Gene amplification        | CsWUS-F        | ATGGAACCTCAACAACAGCA                         |
|                           | CsWUS-R        | TTATATAGAGCCCGAGGATC                         |
| Primer for overexpression | Pbi121-CsWUS-F | ACGGGGGACTCTAGAGGATCCATGGAACCTCAACAACAGCA    |
|                           | Pbi121-CsWUS-R | CGATCGGGGAAATTCGAGCTCTTATATAGAGCCCGAGGATC    |
| qRT-PCR                   | CsWUS-F        | GGGGTTTCTGCTACACTTCCT                        |
|                           | CsWUS-R        | ATGGGAAAGAGAGGGGAGGGTT                       |
|                           | CsWOX1-F       | TGACGAACACAAGACCACTA                         |
|                           | CsWOX1-R       | CTTTCCTGTAAATGATCATCT                        |
|                           | CsWOX2-F       | ATAACCGCTCCTTCCTCTTC                         |
|                           | CsWOX2-R       | ATCCTTGTCCTCCTTCTCCG                         |
|                           | CsWOX3-F       | AGAACACCAATCTCTTGCCCTT                       |
|                           | CsWOX3-R       | CATTTTGCCTTCAATCTTACC                        |
|                           | CsWOX4-F       | AACGGTTACGCCCTCTTGCT                         |
|                           | CsWOX4-R       | GTATCCCTATCTGCTCCTGC                         |
|                           | CsWOX5-F       | GCTGTTTATGCTATGATTTGTGAG                     |
|                           | CsWOX5-R       | GGATTTGGAGCTGTGCAGGTGTCG                     |
|                           | CsWOX6-F       | GCTGGCTCTTCTTCATTTTGTG                       |
|                           | CsWOX6-R       | ATTGGTCCCCTTGGAATTTCTG                       |
|                           | CsWOX7-F       | AGGGAGAGACAGAAGCGTCGCAAAG                    |
|                           | CsWOX7-R       | GCATCCTCATCTTCTCTGACTCTTG                    |
|                           | CsWOX8-F       | AAAGCAAGAGAGAGGCAAAAGC                       |
|                           | CsWOX8-R       | GGCAGGAGGAGACTGAAAGGTG                       |
|                           | CsWOX9-F       | TCAGCCTGCTCCTCTGTTTCC                        |
|                           | CsWOX9-R       | ACTGGTTGTCTTGTCCATTTC                        |
|                           | CsWOX10-F      | GGATGATGGGTTACAATGATAGT                      |
|                           | CsWOX10-R      | AATGGTGATTAGGCCAAAGAAG                       |
| Primer for VIGS           | TRV2-          | GAAGGCCTCCATGGGGATCCATGGAACCTCA              |
|                           | CsWUS-F        | ACAACAGCAA                                   |
|                           | TRV2-          | GTCTTCGGGACATGCCCGGGGGAAGTGTAGC              |
|                           | CsWUS-R        | AGAAACCCCA                                   |
|                           | pTRV1-F        | TTACAGGTTATTTGGGCTGG                         |
|                           | pTRV1-R        | CCGGGTTCAATTCCTTATC                          |
|                           | pTRV2-F        | ATTCAGTGGGAGATGATACGCT                       |
| Subcellular localization  | pTRV2-R        | AGTCGGCCAACGCCGATCTCA                        |
|                           | GFP-           | CCGTCGACCCCGGGGTACCATGGAACCT                 |
|                           | CsWUS-F        | CAACAACAGCA                                  |
|                           | GFP-CsWUS-R    | CCCTTGCTCACCATGAATTCTTATATAGAGC<br>CCGAGGATC |
| Primer                    | ProWUS-F       | ATGATGAATTGAAAAGCTTCTAGTCAAGA                |

|                             |                         |                              |
|-----------------------------|-------------------------|------------------------------|
|                             |                         | TTAATAACCAAGAC               |
| for Y1H                     | ProWUS-R                | ATACAGAGCACATGCCTCGAGCTAAATA |
|                             |                         | AAACTAATGGGCCA               |
| Primer<br>for Y2H           | BD-CsWUS-<br>F          | TCAGAGGAGGACCTGCATATGCACGCT  |
|                             | BD-CsWUS-<br>R          | GGACTCCCACAACT               |
|                             |                         | CTAGTTATGCGGCCGCTGCAGCCTCT   |
|                             |                         | CTCGAGCTTTGTAGT              |
| Primer<br>for BiFC          | cYFP-<br>CsWUS-F        | CCCAGGCCTACTAGTGGATCCATGGC   |
|                             | cYFP-<br>CsWUS-R        | CAAGCAACGACGG                |
|                             | nYFP-<br>CsCYCD3-F      | ACCCTCGAGGTCGACGGATCCAAGGC   |
|                             | nYFP-<br>CsCYCD3 -<br>R | CCAGCTCAGCGCA                |
|                             |                         | TGGCGCGCCACTAGTGGATCCATGGC   |
|                             |                         | CAAGCAACGACGG                |
|                             |                         | GACAGTACTATCGATGGATCCAAGGC   |
|                             |                         | CCAGCTCAGCGCA                |
| Primer<br>For LUC           | 0800-<br>proWUS1-F      | AGGTCGACGGTATCGATAAGCTTCT    |
|                             | 0800-<br>proWUS1-R      | AGTCAAGATTAATAACCAAGAC       |
|                             | 62sk-RAP2-<br>12-F      | GCCGCTCTAGAACTAGTGGATCCTCGA  |
|                             | 62sk-RAP2-<br>12-R      | GACTCGAACCTTAAAA             |
|                             | 0800-<br>proWUS2-F      | GCCGCTCTAGAACTAGTGGATCCAT    |
|                             | 0800-<br>proWUS2-R      | GTGTGGAGGTGCTATCAT           |
|                             | 62sk-HB29-F             | GAGGTCGACGGTATCGATAAGCTTA    |
|                             | 62sk-HB29-<br>R         | TACACTCCCCCTAGGGTAG          |
|                             |                         | AGGTCGACGGTATCGATAAGCTTGC    |
|                             |                         | GCGTGCTCTACTAGTACA           |
|                             |                         | GCCGCTCTAGAACTAGTGGATCCCTA   |
|                             |                         | AATAAACTAATGGGCCA            |
|                             |                         | GCCGCTCTAGAACTAGTGGATCCATG   |
|                             |                         | GATCTCAGTTTGGTTCC            |
|                             |                         | GAGGTCGACGGTATCGATAAGCTTCG   |
|                             |                         | CCGCAGCCGGAGGAGCCG           |
| Primer for<br>motif binding | AD-CsWUS-<br>F          | GTACCAGATTACGCTCATATGATGGAA  |
|                             | AD-CsWUS-<br>R          | CCTCAACAACAGCA               |
| Prime for RT-<br>PCR        | RT-RAP2-<br>12 F        | AGCTCGAGCTCGATGGATCCTTATATA  |
|                             | RT-RAP2-<br>12 R        | GAGCCCGAGGATC                |
|                             | RT-HB29 F               | GTGGAGGTGCTATCATTTTCGGG      |
|                             | RT-HB29 R               | ATCGGCTTTGAGTACTTCTTGT       |
|                             |                         | AACCAAACATAATCAACTACAAAG     |
|                             |                         | GGGTCCTTGAATAGCAACAAACGC     |

RT-  
*CsCYCD3* F

GAATTGGGAGGACGAACTGA

RT-  
*CsCYCD3* R

ATTGGAACGGGAACTGGGAT

---
